# Supplementary material for: Expanded graphene oxide fibers with high strength and increased elongation
Source: Royal Society of Chemistry journal article supplement (doi:10.1039/c8ra09464k), 2019-01-01
Supplement: c8ra09464k1.pdf [file c8ra09464k1.pdf]

## Supporting Information

### Expanded Graphene Oxide Fibers with High Strength and Increased Elongation

Ashok D. Ugale<sup>a</sup>, LinLin Chi<sup>b</sup>, Min-Kyu Kim<sup>a</sup>, Sudong Chae<sup>b</sup>, Jae-Young Choi<sup>\*b</sup>, and Ji-Beom Yoo<sup>\*ab</sup>

a. Sungkyunkwan Advanced Institute of Nanotechnology (SAINT), Sungkyunkwan University, Suwon, 440-746, Republic of Korea. E-mail: jbyoo@skku.edu

b. Advanced Materials Science and Engineering Sungkyunkwan University, Suwon, 440-746, Republic of Korea. E-mail: jy.choi@skku.edu

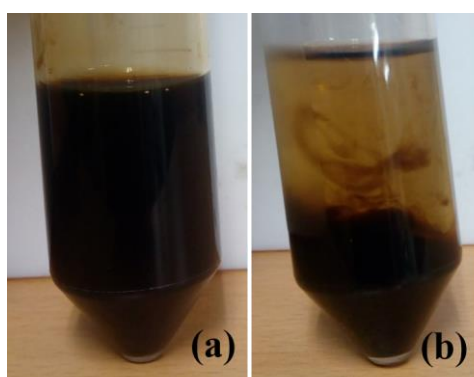

**Figure S1.** Dispersion solution of (a) EGO and (b) GO in DI water after four days.

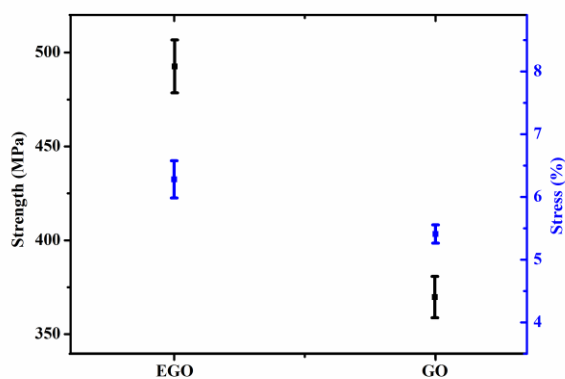

**Figure S2.** Average mechanical properties of fibers.

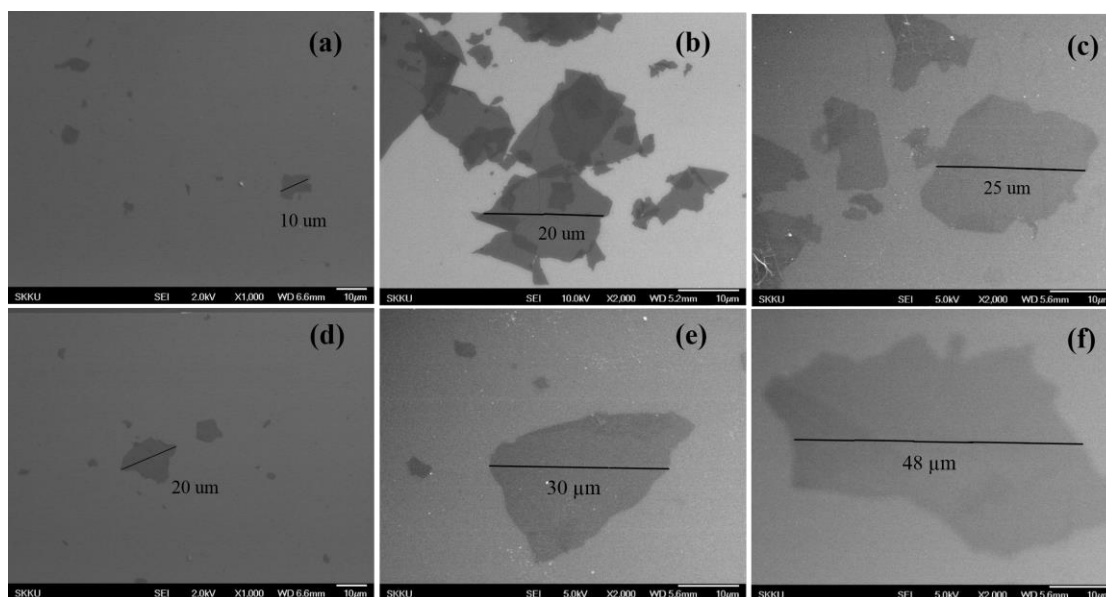

**Figure S3.** SEM images of (a-c) GO and (d-f) EGO sheets.

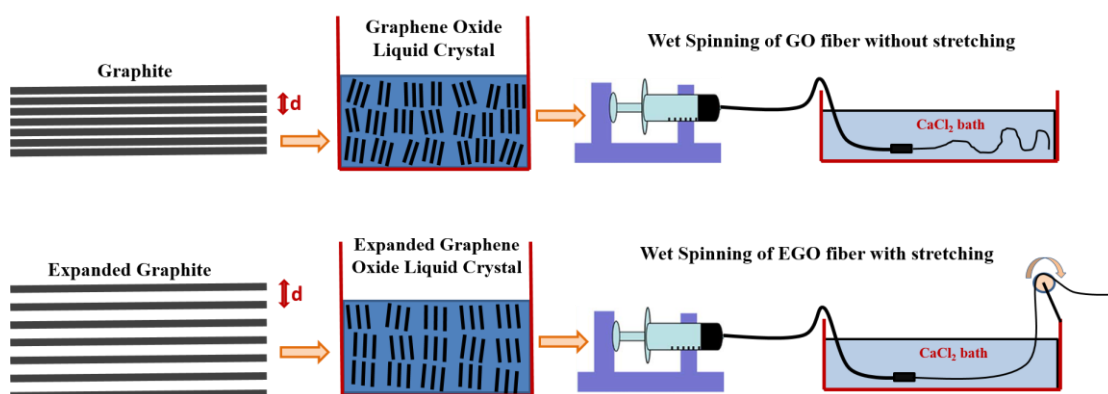

**Figure S4.** Schematic diagrams of G and EG, their crystalline solutions and wet spinning of fibers with and without stretching in coagulation bath.

**Table S1.** Summary of different methods to improve the mechanical properties of GO fibers.

| No | Methods                                                                                  | Mechanical Strength of GO fibers [MPa] | Elongation break [%] | Reference |
|----|------------------------------------------------------------------------------------------|----------------------------------------|----------------------|-----------|
| 1  | Chemically expanded graphite                                                             | 492                                    | 6.1                  | This Work |
| 2  | Using phenolic carbon                                                                    | 220                                    | 13.4                 | 5         |
| 2  | Using giant graphene oxide sheets                                                        | 364.4                                  | 6.8                  | 12        |
| 3  | By introducing artificial nacre composites                                               | 652                                    | 4                    | 14        |
| 4  | Intercalating small-sized graphene sheets into fibers consisting of large-sized graphene | 300                                    | -                    | 15        |
| 5  | Trivalent metal ion binders                                                              | 486.4                                  | 0.62                 | 16        |

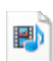

Fiber-stretching.mp4

**Video 1.** Stretching while spinning fiber in the coagulation bath.

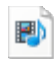

Fiber drying.mp4

**Video 2.** Stretching of fiber while drying.
